# Supplementary material for: Predicting Organometallic Intermediates in the Surface-Assisted Ullmann Coupling of Chrysene Isomers
Source: MDPI journal article supplement (doi:10.3390/molecules29071553), 2024-03-30
Supplement: s1 [file s1]

## Supporting Information

for

Predicting Organometallic Intermediates in the Surface-Assisted Ullmann  
Coupling of Chrysene Isomers

Jakub Lisiecki and Paweł Szabelski\*

*Department of Theoretical Chemistry, Institute of Chemical Sciences, Faculty of Chemistry,  
Maria Curie-Skłodowska University in Lublin,  
Pl. M.C. Skłodowskiej 3, 20-031 Lublin, Poland*

### **Orientational order parameter**

The orientational order parameter was calculated as the ensemble average, using the following equation:

$$\delta = \frac{|N_{l1} - N_{l2}| + |N_{l2} - N_{l3}| + |N_{l1} - N_{l3}|}{2 * N_l} \quad \text{Eq. S1}$$

where  $N_{l1}$ ,  $N_{l2}$ ,  $N_{l3}$  are the average numbers of linkers oriented along the 3 main directions of a triangular lattice, and  $N_l$  is the total number of linkers in the system. As every linker in the pair is counted twice, the result is divided by 2. For  $\delta_a$  (arm-based) the orientation of a linker was determined by the relative position of the first two segments, for  $\delta_c$  (core-based) – the orientation was determined by the position of two middle segments (as shown in Fig. S1).

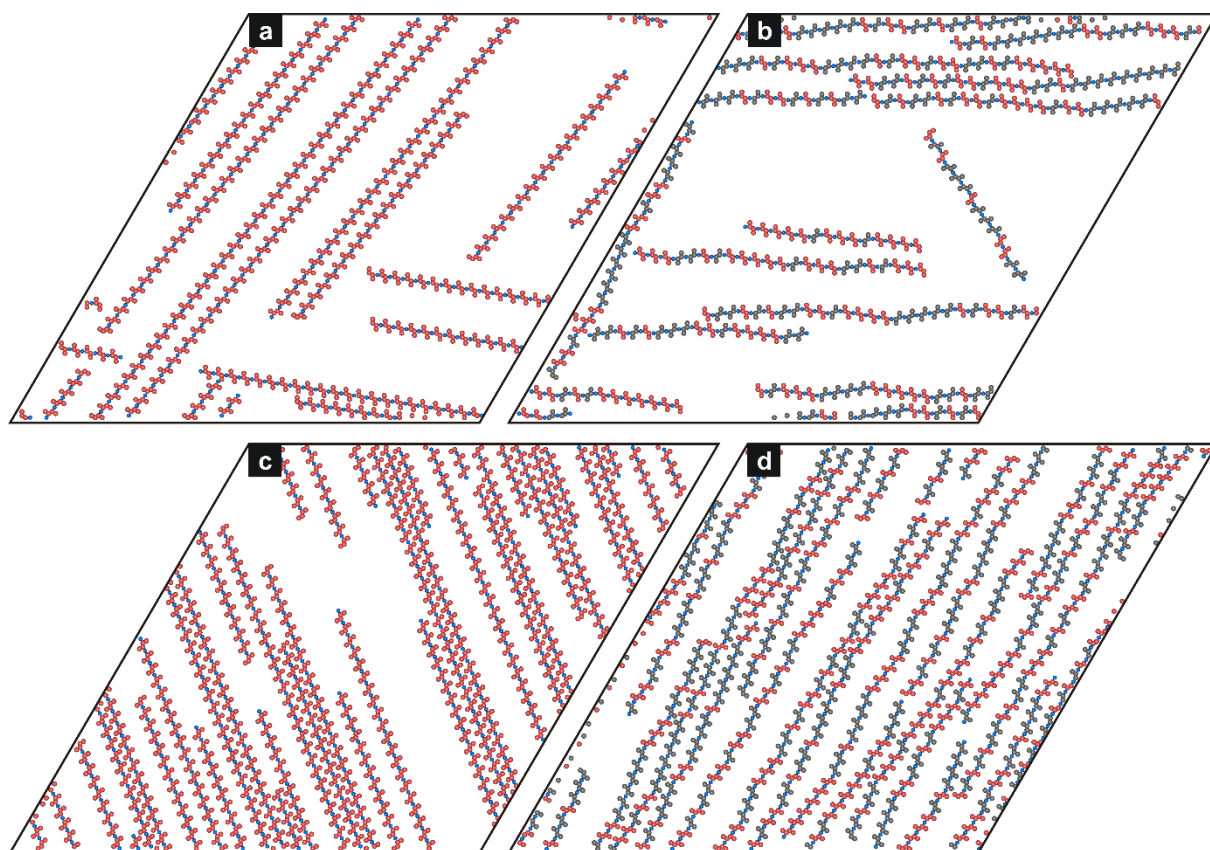

**Figure S1.** Simulated enantiopure (a, c) and racemic (b, d) overlays comprising 300S (a) and 500S (c) and 150R + 150S (b) and 250R + 250S (d) molecules of **ch6\_12** mixed with 300 and 500 metal atoms, respectively;  $T = 0.01$ .

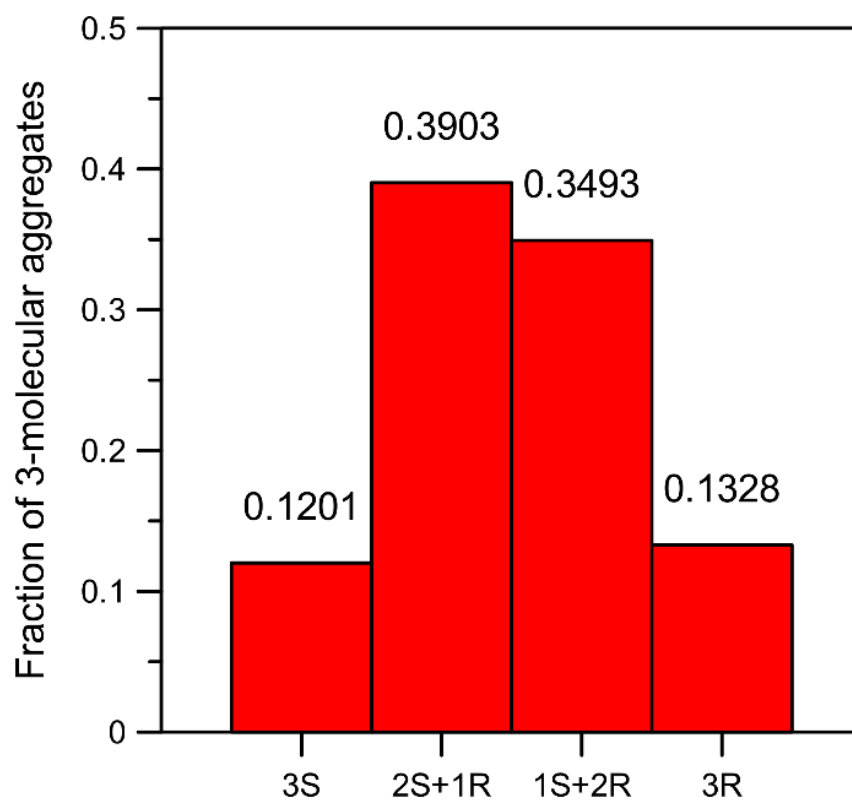

**Figure S2.** Relative abundance of trimolecular aggregates of **ch36** having different enantiomeric compositions ( $N_l = 400$ ,  $T = 0.01$ ).

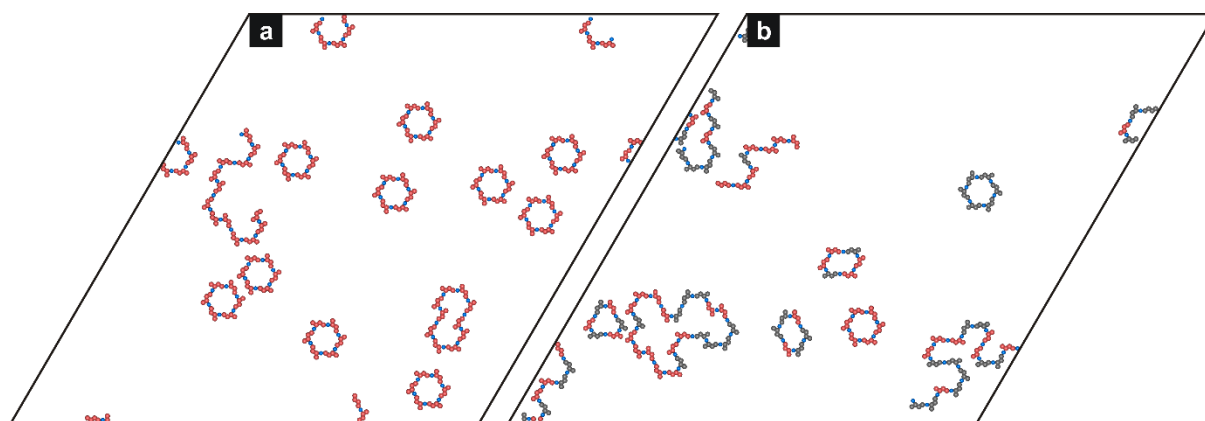

**Figure S3.** Simulated enantiopure (a) and racemic (b) overlays comprising 100S (a) and 50R + 50S (b) molecules of **ch26** mixed with 100 metal atoms;  $T = 0.01$ .

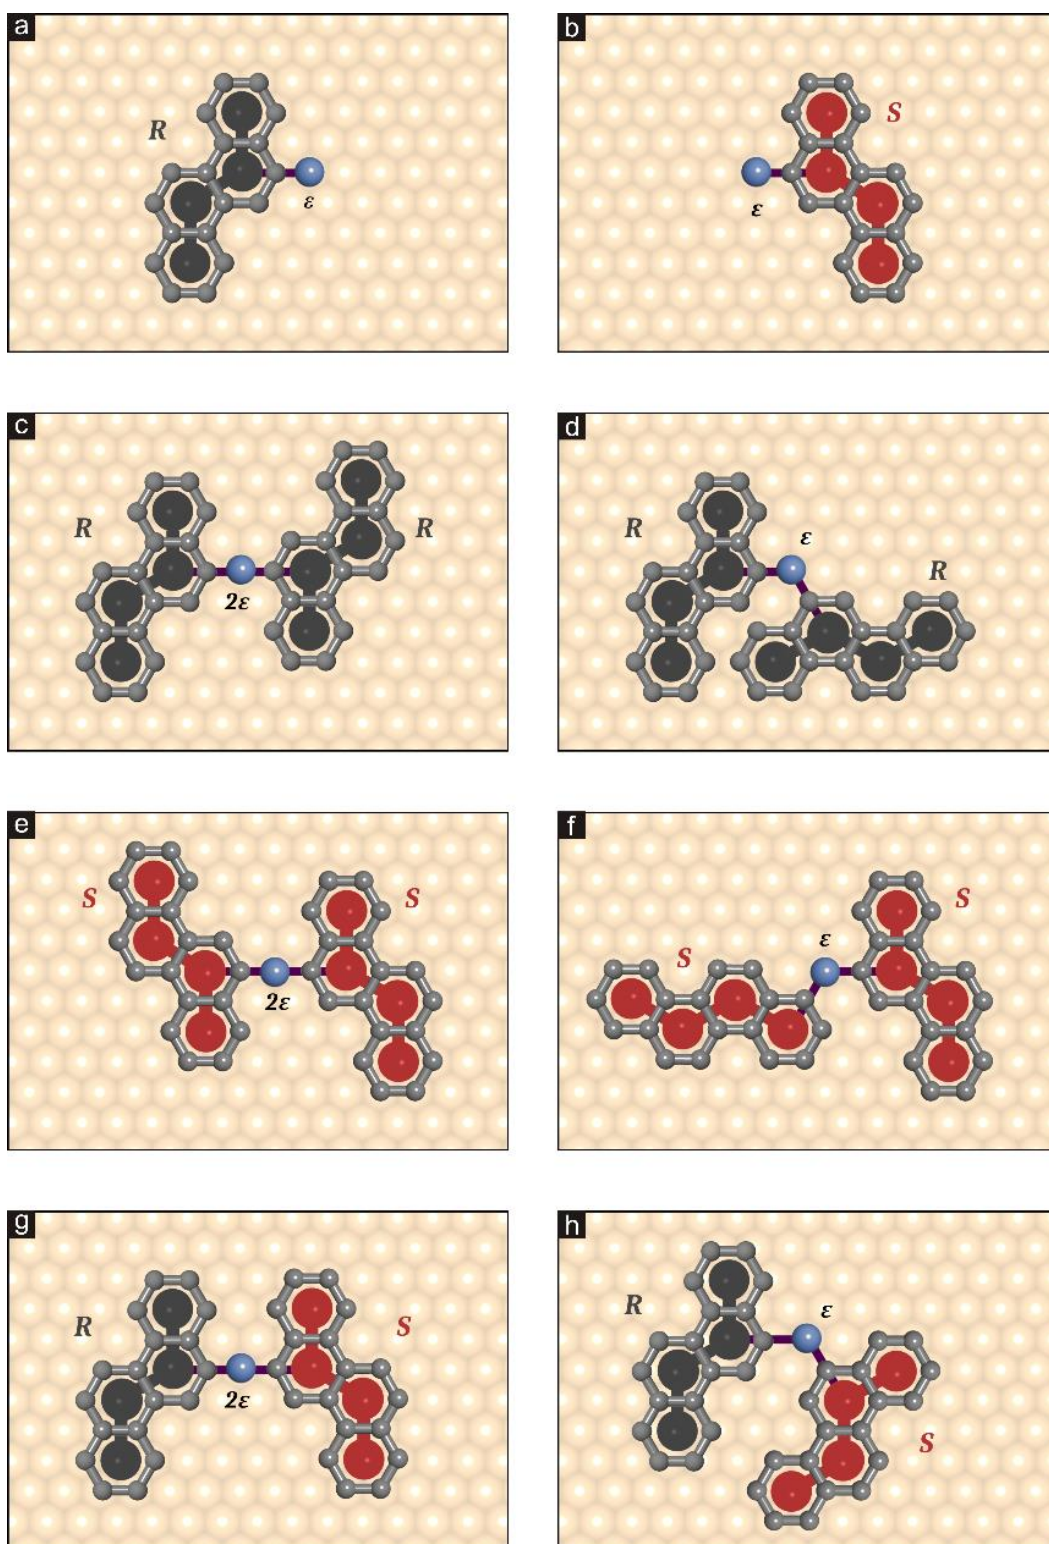

**Figure S4.** Energies of the mono- and bimolecular metal-mediated links assumed in the simulations. Metal atoms are depicted in blue while the enantiomers *R* and *S* are colored in grey and red, respectively. Single molecular connections (a, b) contribute with energy  $\epsilon$ , while linear (c, e, g) and 120° (d, f, h) bimolecular nodes contribute with,  $2\epsilon$  and  $\epsilon$ , respectively.

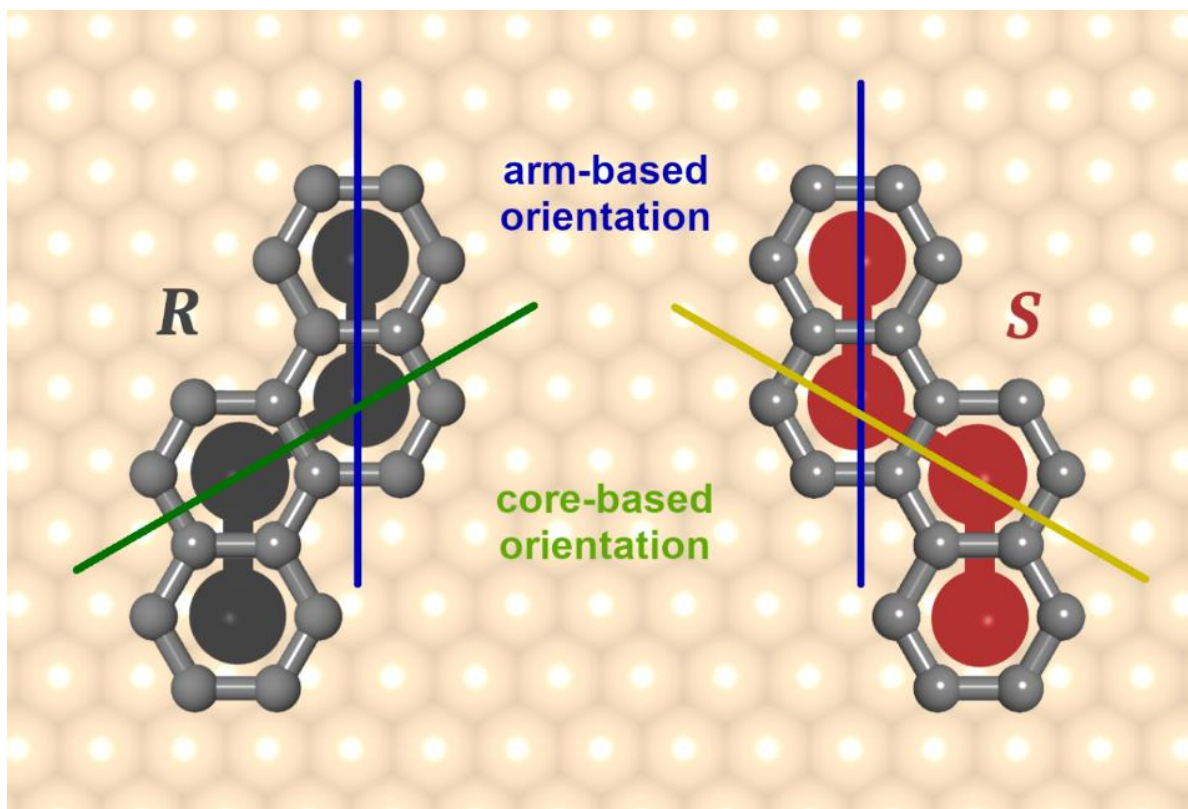

**Figure S5.** Schematic illustration of the core (shades of green) and arm (blue) reference directions used in the definition of the orientational order parameters and  $\delta_c$  and  $\delta_a$ , respectively.
